# Supplementary material for: Combined Features Based on Preoperative Controlling Nutritional Status Score and Circulating Tumour Cell Status Predict Prognosis for Colorectal Cancer Patients Treated with Curative Resection
Source: PubMed Central journal article supplement — Int J Biol Sci. 2019 May 12;15(6):1325–35. doi: 10.7150/ijbs.33671 (PMC6567813; doi:10.7150/ijbs.33671), 2019-05-12
Supplement: ijbsv15p1325s1.pdf [file ijbsv15p1325s1.pdf]

# **Combined Features Based on Preoperative Controlling Nutritional Status Score and Circulating Tumour Cell Status Predict Prognosis for Colorectal Cancer Patients Treated with Curative Resection**

Chaogang Yang<sup>1,2,3\*</sup>, Chen Wei<sup>1,2,3\*</sup>, Shuyi Wang<sup>1,2,3\*</sup>, Song Han<sup>4</sup>, Dongdong Shi<sup>1,2,3</sup>, Chunxiao Zhang<sup>1,2,3</sup>, Xiaobin Lin<sup>1,2,3</sup>, Rongzhang Dou<sup>1,2,3</sup>, Bin Xiong<sup>1,2,3</sup>

1. Department of Gastrointestinal Surgery & Department of Gastric and Colorectal Surgical Oncology, Zhongnan Hospital of Wuhan University, Wuhan 430071, China;
2. Hubei Key Laboratory of Tumor Biological Behaviors, Wuhan 430071, China;
3. Hubei Cancer Clinical Study Center, Wuhan 430071, China;
4. Department of Circulating Tumor Cells, YZY Medical Technological company, Wuhan 430075, China.

\*These authors contributed equally to this work.

Corresponding author: Dr. Bin Xiong, MD. Email: [binxiong1961@whu.edu.cn](mailto:binxiong1961@whu.edu.cn); Tel.:+862767813152

**Table S1.** The demographics and clinicopathological characteristics of 160 CRC patients

| Items                        | Value           |
|------------------------------|-----------------|
| Age (Mean $\pm$ SD, years)   | 58.4 $\pm$ 11.8 |
| Gender [n (%)]               |                 |
| Male                         | 90 (56.3)       |
| Female                       | 70 (43.7)       |
| BMI (kg/m <sup>2</sup> )     |                 |
| <18.5                        | 69 (43.1)       |
| $\geq$ 18.5, <25.0           | 70 (43.8)       |
| $\geq$ 25.0                  | 21 (13.1)       |
| Tumour location              |                 |
| Colon                        | 93 (58.1)       |
| Rectal                       | 67 (41.9)       |
| Tumour size (cm)             |                 |
| <3                           | 91 (56.9)       |
| $\geq$ 3                     | 69 (43.1)       |
| Histopathological type       |                 |
| Well                         | 38 (23.8)       |
| Moderate                     | 55 (34.4)       |
| Poor                         | 67 (41.8)       |
| Depth of tumour invasion     |                 |
| T1                           | 4 (2.5)         |
| T2                           | 20 (12.5)       |
| T3                           | 62 (38.8)       |
| T4                           | 74 (46.2)       |
| Lymph node metastasis        |                 |
| N0                           | 52 (32.5)       |
| N1                           | 53 (33.1)       |
| N2                           | 34 (21.3)       |
| N3                           | 21 (13.1)       |
| pTNM stage                   |                 |
| I                            | 13 (8.1)        |
| II                           | 78 (48.8)       |
| III                          | 69 (43.1)       |
| Lymphatic vessel invasion    |                 |
| Negative                     | 96 (60.0)       |
| Positive                     | 64 (40.0)       |
| Nerve invasion               |                 |
| Negative                     | 98 (61.2)       |
| Positive                     | 62 (38.8)       |
| Severe complication          |                 |
| Absence                      | 136 (85.0)      |
| Presence                     | 24 (15.0)       |
| Adjuvant chemotherapy        |                 |
| No                           | 78 (48.8)       |
| Yes                          | 82 (51.2)       |
| Preoperative CEA (ng/ml)     |                 |
| <5                           | 111 (69.4)      |
| $\geq$ 5                     | 49 (30.6)       |
| Preoperative CA125 (U/ml)    |                 |
| <35                          | 123 (76.9)      |
| $\geq$ 35                    | 37 (23.1)       |
| Preoperative CA199 (U/ml)    |                 |
| <37                          | 115 (71.9)      |
| $\geq$ 37                    | 45 (28.1)       |
| Preoperative CONUT score     |                 |
| Low                          | 86 (53.8)       |
| High                         | 74 (46.2)       |
| Preoperative CTC             |                 |
| Negative                     | 43 (26.9)       |
| Positive                     | 117 (73.1)      |
| Preoperative CONUT-CTC score |                 |
| 0                            | 34 (21.3)       |
| 1                            | 61 (38.1)       |
| 2                            | 65 (40.6)       |

Notes: CRC, colorectal cancer; BMI, body mass index; TNM, tumour-node-metastasis; CEA, carcinoembryonic antigen; CA125, carbohydrate antigen 125; CA199; carbohydrate antigen 199; CONUT, controlling nutritional status; CTC, circulating tumour cell.

**Table S2.** Analyses of factors regarding recurrence-free survival of CRC patients

| Variables                    | No. | No. of recurrence (%) | Median RFS (Range) | $\chi^2$ value | <i>P</i> value |
|------------------------------|-----|-----------------------|--------------------|----------------|----------------|
| Gender                       |     |                       |                    | 0.261          | 0.609          |
| Male                         | 90  | 40 (44.4)             | 31.3 (28.9-33.7)   |                |                |
| Female                       | 70  | 28 (40.0)             | 31.9 (29.3-34.4)   |                |                |
| Age (years)                  |     |                       |                    | 2.184          | 0.139          |
| <60                          | 83  | 41 (49.4)             | 30.6 (28.2-33.0)   |                |                |
| ≥60                          | 77  | 27 (35.1)             | 33.2 (30.6-35.8)   |                |                |
| BMI (kg/m <sup>2</sup> )     |     |                       |                    | 2.920          | 0.232          |
| <18.5                        | 69  | 35 (50.7)             | 30.4 (27.8-33.1)   |                |                |
| ≥18.5, <25.0                 | 70  | 22 (31.4)             | 33.7 (31.0-36.4)   |                |                |
| ≥25.0                        | 21  | 11 (52.4)             | 30.3 (25.9-34.6)   |                |                |
| Tumour location              |     |                       |                    | 1.840          | 0.175          |
| Colon                        | 93  | 35 (37.6)             | 32.8 (30.4-35.1)   |                |                |
| Rectal                       | 67  | 33 (49.3)             | 30.4 (27.8-33.1)   |                |                |
| Tumour size (cm)             |     |                       |                    | 0.170          | 0.680          |
| <3                           | 91  | 38 (41.8)             | 32.1 (29.8-34.4)   |                |                |
| ≥3                           | 69  | 30 (43.5)             | 30.9 (28.3-33.5)   |                |                |
| Histopathological type       |     |                       |                    | 4.044          | 0.044*         |
| Well-moderate                | 93  | 35 (37.6)             | 33.2 (31.0-35.5)   |                |                |
| Poor                         | 67  | 33 (49.3)             | 29.5 (26.7-32.3)   |                |                |
| Depth of tumour invasion     |     |                       |                    | 4.927          | 0.026*         |
| T1-T2                        | 24  | 3 (12.5)              | 38.6 (33.8-40.1)   |                |                |
| T3-T4                        | 136 | 65 (47.8)             | 31.0 (29.1-32.9)   |                |                |
| Lymph node metastasis        |     |                       |                    | 16.630         | <0.001*        |
| N0-1                         | 105 | 33 (31.4)             | 34.4 (32.4-36.5)   |                |                |
| N2-3                         | 55  | 35 (53.8)             | 26.9 (24.1-29.6)   |                |                |
| pTNM stage                   |     |                       |                    | 28.486         | <0.001*        |
| I-II                         | 91  | 23 (25.3)             | 36.1 (34.0-38.1)   |                |                |
| III                          | 69  | 45 (65.2)             | 26.5 (24.1-28.7)   |                |                |
| Lymphatic vessel invasion    |     |                       |                    | 11.099         | 0.001*         |
| Negative                     | 96  | 31 (32.3)             | 34.3 (32.2-36.5)   |                |                |
| Positive                     | 64  | 37 (57.8)             | 28.3 (25.5-31.1)   |                |                |
| Nerve invasion               |     |                       |                    | 7.980          | 0.005*         |
| Negative                     | 98  | 33 (33.7)             | 33.9 (31.7-36.0)   |                |                |
| Positive                     | 62  | 35 (56.5)             | 28.8 (26.0-31.8)   |                |                |
| Severe complication          |     |                       |                    | 0.989          | 0.320          |
| Absence                      | 136 | 54 (39.7)             | 32.2 (30.2-34.1)   |                |                |
| Presence                     | 24  | 14 (58.3)             | 29.8 (25.7-33.9)   |                |                |
| Adjuvant chemotherapy        |     |                       |                    | 6.542          | 0.011*         |
| No                           | 78  | 24 (30.8)             | 34.4 (31.9-36.8)   |                |                |
| Yes                          | 82  | 44 (53.7)             | 29.6 (27.2-32.1)   |                |                |
| Preoperative CEA (ng/ml)     |     |                       |                    | 2.754          | 0.097          |
| <5                           | 111 | 43 (38.7)             | 32.7 (30.6-34.8)   |                |                |
| ≥5                           | 49  | 25 (51.0)             | 29.5 (30.0-33.5)   |                |                |
| Preoperative CA125 (U/ml)    |     |                       |                    | 2.632          | 0.105          |
| <35                          | 123 | 47 (38.2)             | 32.6 (30.5-34.6)   |                |                |
| ≥35                          | 37  | 21 (56.8)             | 28.4 (25.4-31.5)   |                |                |
| Preoperative CA199 (U/ml)    |     |                       |                    | 2.340          | 0.126          |
| <37                          | 115 | 43 (37.4)             | 32.6 (30.5-34.8)   |                |                |
| ≥37                          | 45  | 25 (55.6)             | 29.4 (26.4-32.3)   |                |                |
| Preoperative CONUT score     |     |                       |                    | 18.491         | <0.001*        |
| Low                          | 86  | 24 (27.9)             | 35.5 (33.3-37.6)   |                |                |
| High                         | 74  | 44 (59.5)             | 27.7 (25.2-30.3)   |                |                |
| Preoperative CTC             |     |                       |                    | 19.318         | <0.001*        |
| Negative                     | 43  | 5 (11.6)              | 39.2 (37.0-41.4)   |                |                |
| Positive                     | 117 | 63 (53.8)             | 29.3 (27.3-31.4)   |                |                |
| Preoperative CONUT-CTC score |     |                       |                    | 32.850         | <0.001*        |
| 0                            | 34  | 4 (11.8)              | 39.2 (36.8-41.7)   |                |                |
| 1                            | 61  | 21 (34.4)             | 34.2 (31.6-36.9)   |                |                |
| 2                            | 65  | 43 (66.2)             | 25.7 (23.4-28.1)   |                |                |
| Overall                      | 160 | 68 (42.5)             | 31.8 (30.0-33.5)   | -              | -              |

Notes: \* indicates  $P < 0.05$ . CRC, colorectal cancer; BMI, body mass index; TNM, tumour-node-metastasis; CEA, carcinoembryonic antigen; CA125, carbohydrate antigen 125; CA199, carbohydrate antigen 199; CONUT, controlling nutritional status; CTC, circulating tumour cell; RFS, recurrence-free survival.

**Table S3.** Analyses of factors regarding cancer-specific survival of CRC patients

| Variables                    | No. | No. of death (%) | Median CSS (Range) | $\chi^2$ value | <i>P</i> value |
|------------------------------|-----|------------------|--------------------|----------------|----------------|
| Gender                       |     |                  |                    | 0.178          | 0.673          |
| Male                         | 90  | 28 (31.1)        | 36.3 (34.7-38.0)   |                |                |
| Female                       | 70  | 19 (27.1)        | 36.2 (34.4-37.9)   |                |                |
| Age (years)                  |     |                  |                    | 0.331          | 0.565          |
| <60                          | 83  | 27 (32.5)        | 36.2 (34.5-37.9)   |                |                |
| ≥60                          | 77  | 20 (26.0)        | 36.9 (35.0-38.8)   |                |                |
| BMI (kg/m <sup>2</sup> )     |     |                  |                    | 3.645          | 0.162          |
| <18.5                        | 69  | 28 (40.6)        | 35.3 (33.4-37.2)   |                |                |
| ≥18.5, <25.0                 | 70  | 13 (18.6)        | 38.1 (36.2-39.9)   |                |                |
| ≥25.0                        | 21  | 6 (28.8)         | 36.1 (35.3-37.8)   |                |                |
| Tumour location              |     |                  |                    | 1.610          | 0.204          |
| Colon                        | 93  | 23 (24.7)        | 37.2 (35.6-38.9)   |                |                |
| Rectal                       | 67  | 24 (35.8)        | 35.7 (33.7-37.6)   |                |                |
| Tumour size (cm)             |     |                  |                    | 1.192          | 0.275          |
| <3                           | 91  | 24 (26.4)        | 37.2 (35.6-38.8)   |                |                |
| ≥3                           | 69  | 23 (33.3)        | 35.1 (33.2-37.0)   |                |                |
| Histopathological type       |     |                  |                    | 4.116          | 0.042*         |
| Well-moderate                | 93  | 23 (24.7)        | 37.6 (36.0-39.1)   |                |                |
| Poor                         | 67  | 24 (35.8)        | 34.9 (32.8-37.0)   |                |                |
| Depth of tumour invasion     |     |                  |                    | 2.115          | 0.146          |
| T1-T2                        | 24  | 3 (12.5)         | 38.9 (35.8-42.1)   |                |                |
| T3-T4                        | 136 | 44 (32.4)        | 36.2 (34.8-37.5)   |                |                |
| Lymph node metastasis        |     |                  |                    | 14.264         | <0.001*        |
| N0-1                         | 105 | 21 (20.0)        | 38.2 (36.8-39.7)   |                |                |
| N2-3                         | 55  | 26 (47.3)        | 33.1 (31.1-35.1)   |                |                |
| pTNM stage                   |     |                  |                    | 26.981         | <0.001*        |
| I-II                         | 91  | 12 (13.2)        | 39.5 (38.2-40.8)   |                |                |
| III                          | 69  | 35 (50.7)        | 32.7 (30.9-34.5)   |                |                |
| Lymphatic vessel invasion    |     |                  |                    | 14.131         | <0.001*        |
| Negative                     | 96  | 17 (17.7)        | 38.7 (37.3-40.1)   |                |                |
| Positive                     | 64  | 30 (46.9)        | 33.7 (31.7-35.8)   |                |                |
| Nerve invasion               |     |                  |                    | 6.674          | 0.010*         |
| Negative                     | 98  | 21 (21.4)        | 37.8 (36.2-39.4)   |                |                |
| Positive                     | 62  | 26 (41.9)        | 34.7 (32.7-36.7)   |                |                |
| Severe complication          |     |                  |                    | 0.177          | 0.674          |
| Absence                      | 136 | 38 (27.9)        | 36.6 (35.2-38.0)   |                |                |
| Presence                     | 24  | 9 (37.5)         | 35.8 (32.7-38.8)   |                |                |
| Adjuvant chemotherapy        |     |                  |                    | 10.209         | 0.001*         |
| No                           | 78  | 12 (15.4)        | 38.9 (37.3-40.5)   |                |                |
| Yes                          | 82  | 35 (42.7)        | 34.7 (33.0-36.5)   |                |                |
| Preoperative CEA (ng/ml)     |     |                  |                    | 0.240          | 0.624          |
| <5                           | 111 | 32 (28.8)        | 36.7 (35.2-38.2)   |                |                |
| ≥5                           | 49  | 15 (30.6)        | 36.0 (33.7-38.3)   |                |                |
| Preoperative CA125 ( U/ml)   |     |                  |                    | 2.615          | 0.106          |
| <35                          | 123 | 31 (25.2)        | 37.0 (35.6-38.5)   |                |                |
| ≥35                          | 37  | 16 (43.2)        | 34.2 (32.2-36.3)   |                |                |
| Preoperative CA199 ( U/ml)   |     |                  |                    | 1.830          | 0.176          |
| <37                          | 115 | 29 (25.2)        | 37.0 (35.5-38.5)   |                |                |
| ≥37                          | 45  | 18 (40.0)        | 34.9 (32.9-36.9)   |                |                |
| Preoperative CONUT score     |     |                  |                    | 25.222         | <0.001*        |
| Low                          | 86  | 12 (14.0)        | 39.4 (38.4-40.8)   |                |                |
| High                         | 74  | 35 (47.3)        | 33.2 (31.2-35.1)   |                |                |
| Preoperative CTC             |     |                  |                    | 12.485         | <0.001*        |
| Negative                     | 43  | 2 (4.7)          | 41.1 (40.0-42.3)   |                |                |
| Positive                     | 117 | 45 (38.5)        | 35.2 (33.7-36.7)   |                |                |
| Preoperative CONUT-CTC score |     |                  |                    | 32.805         | <0.001*        |
| 0                            | 34  | 1 (2.9)          | 41.5 (40.6-42.4)   |                |                |
| 1                            | 61  | 12 (19.8)        | 38.8 (37.2-40.3)   |                |                |
| 2                            | 65  | 34 (52.3)        | 31.8 (30.0-37.8)   |                |                |
| Overall                      | 160 | 47 (29.4)        | 36.5 (35.3-37.8)   | -              | -              |

Notes: \*indicates  $P < 0.05$ . CRC, colorectal cancer; BMI, body mass index; TNM, tumour-node-metastasis; CEA, carcinoembryonic antigen; CA125, carbohydrate antigen 125; CA199, carbohydrate antigen 199; CONUT, controlling nutritional status; CTC, circulating tumour cell; CSS: cancer-specific survival.

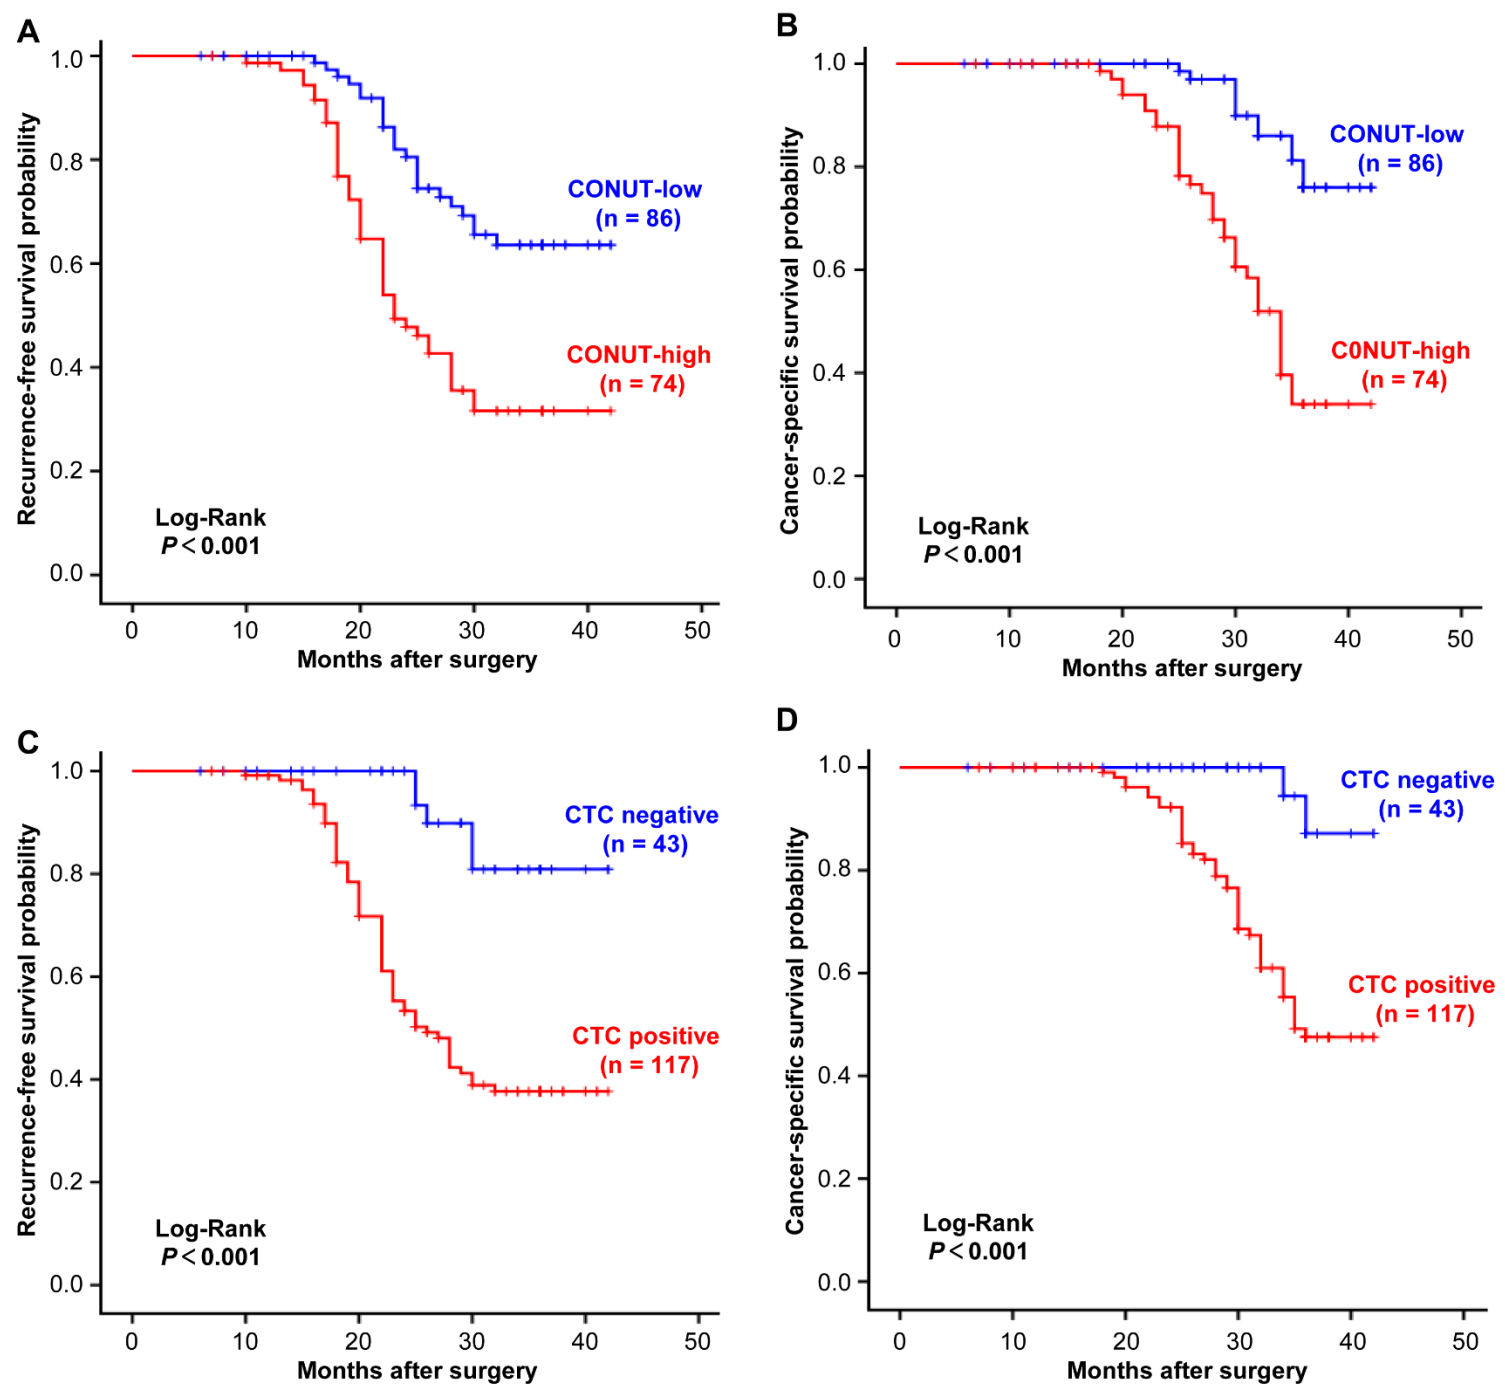

**Figure S1.** Kaplan-Meier curves for CRC patients in the different preoperative CONUT score or CTC status groups. A-B. Recurrence-free survival and cancer-specific survival in preoperative CONUT-low and-high score groups, respectively. C-D. Recurrence-free survival and cancer-specific survival in preoperative CTC negative and positive groups, respectively. Abbreviation: CRC, colorectal cancer; CONUT, controlling nutritional status; CTC, circulating tumour cell.
